# Supplementary material for: Endocytosis-dependent coordination of multiple actin regulators is required for wound healing
Source: PubMed Central journal article supplement — J Cell Biol. 2015 Aug 3;210(3):419–33. doi: 10.1083/jcb.201411037 (PMC4523608; doi:10.1083/jcb.201411037), 2015-08-03
Supplement: supp_jcb.201411037_JCB_201411037_sm.pdf [file supp_jcb.201411037_JCB_201411037_sm.pdf]

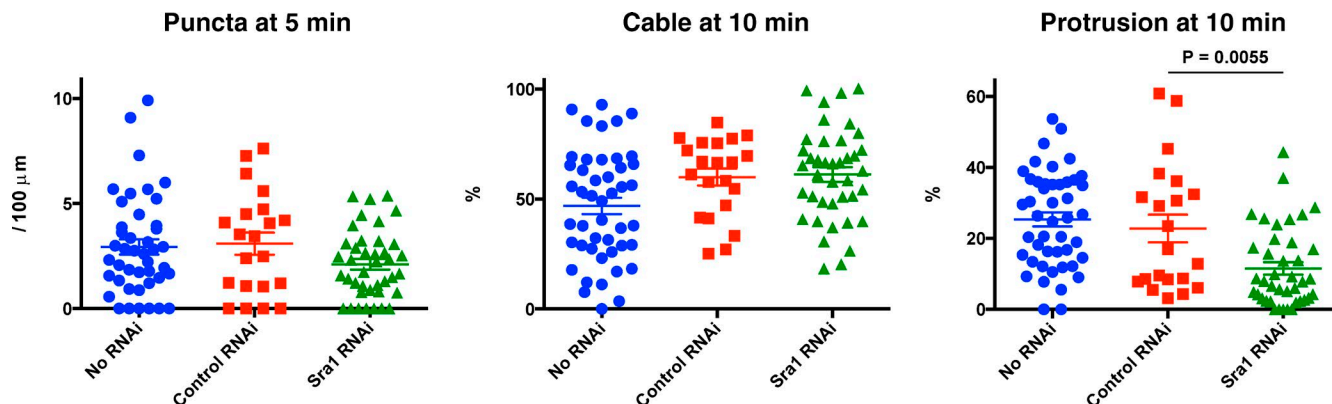

Figure S1. RNAi-mediated knockdown of *sra1*, a gene encoding a regulatory subunit of the SCAR complex, produces results consistent with those obtained for *SCAR<sup>37</sup>* mutants. Quantification of the formation of actin puncta, cable, and protrusions during wound healing in embryos expressing no RNAi, a control RNAi against *ebony*, or an RNAi against *sra1* (which encodes a regulatory subunit of the SCAR complex) under the control of TubP-Gal4. F-actin was visualized using GFP-Moesin. Bars indicate the means  $\pm$  SEM of all plotted values.

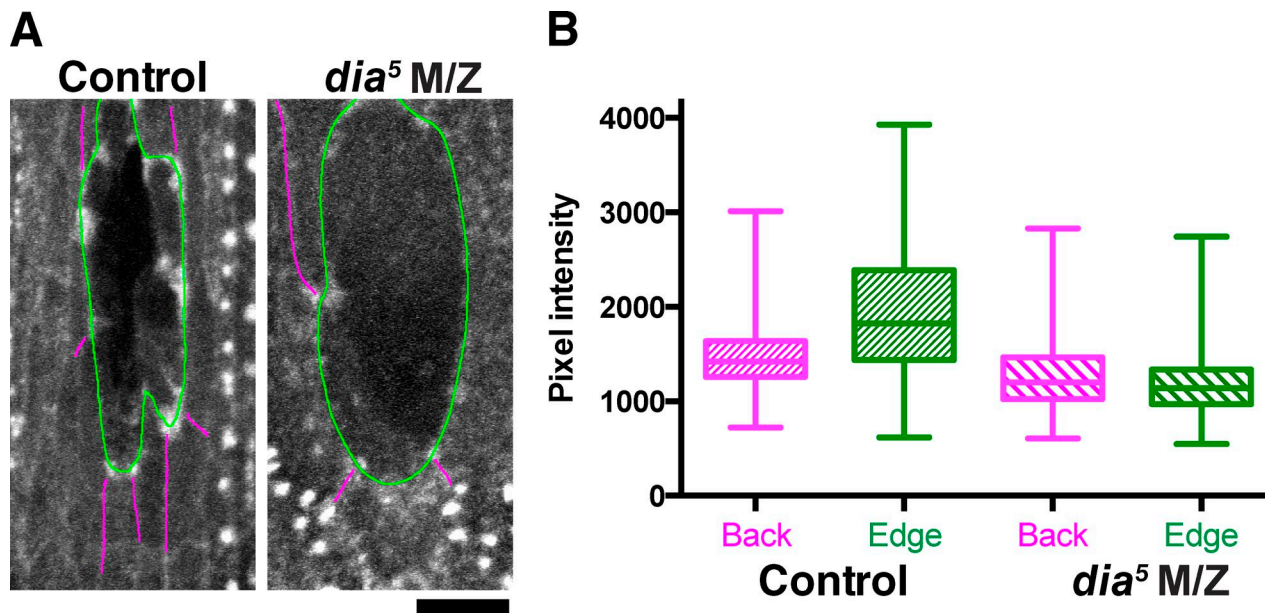

Figure S2. Quantification of the fluorescence intensity of wound edge F-actin and cortical actin behind the edge in control and *dia*<sup>5</sup> M/Z embryos. Quantification of the fluorescence intensity of wound edge F-actin (traced by green line in A and labeled Edge in B) and cortical F-actin just behind the wound edge (traced by magenta line in A and labeled Back in B) in the 4-min images displayed in Fig. 3 A. The distribution of the pixel intensity on the green and magenta lines in each image is shown in B. The boxes extend from the 25 to 75 percentiles, and the whiskers extend from the minimum to maximum. The bars in the middle of the boxes indicate the median. Note that the intensity of Edge actin is significantly greater than Back in control embryos ( $P < 0.0001$ ), whereas in *dia*<sup>5</sup> M/Z embryos, the Edge intensity is no greater than Back.

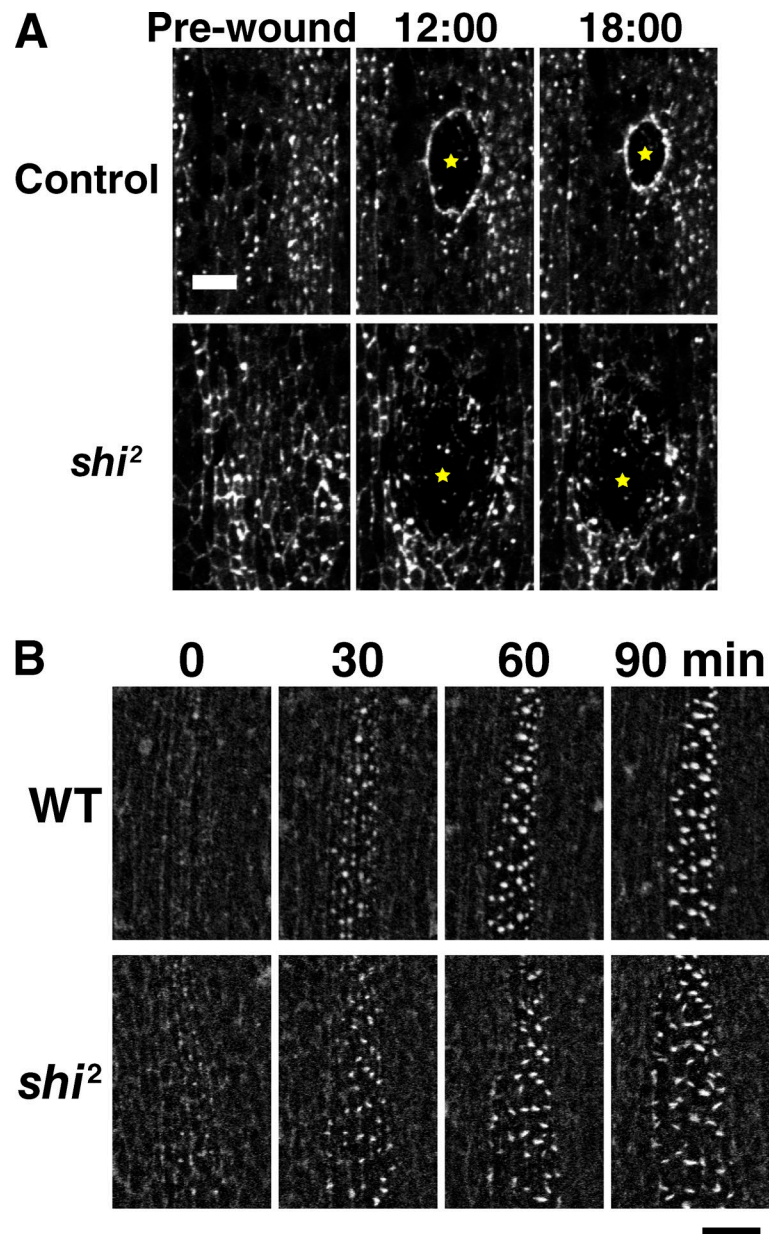

Figure S3. **GFP-Zipper distribution and denticle development in control or *shi*<sup>2</sup> embryos.** Experiments performed at 30°C. (A) GFP-Zipper accumulates at the wound edge in control embryos (top) but not *shi*<sup>2</sup> embryos. Time points indicate time after wounding (minutes and seconds). Stars indicate the position of the wounds. Bar, 10  $\mu$ m. (B) The ventral epidermis of control and *shi*<sup>2</sup> embryos expressing GFP-Moesin. Note that denticle development is not perturbed in *shi*<sup>2</sup> embryos. Images recorded at indicated time points after start of experiment. WT, wild type. Bar, 20  $\mu$ m.

## GFP-Dia $\Delta$ DAD

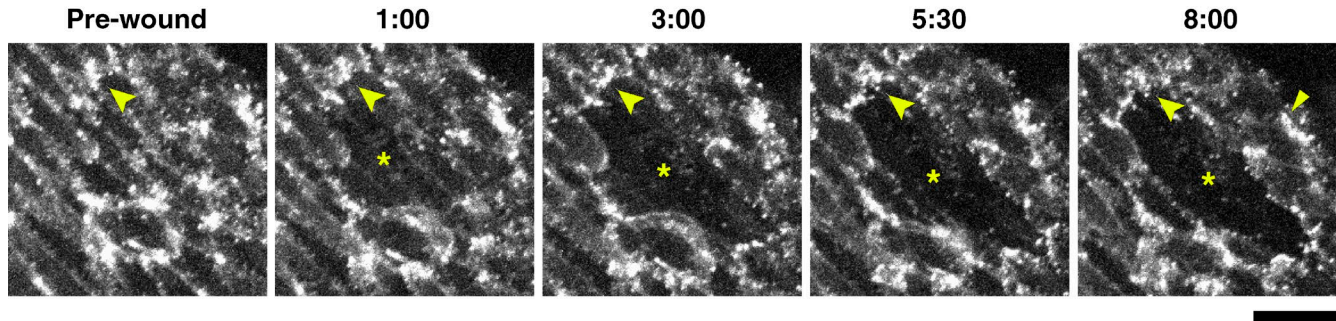

Figure S4. **Localization of GFP-Dia $\Delta$ DAD during wound healing.** Time points after wounding are indicated (minutes and seconds). Levels of GFP-Dia $\Delta$ DAD at wound edge junctions after wounding are comparable to that at the equivalent TCJ before wounding (large arrowheads, all images) and that at other TCJs behind the wound edge (small arrowhead, right-hand image). Asterisks indicate center of wound. Bar, 10  $\mu$ m.

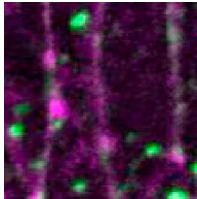

Video 1. **Dynamics of actin and myosin at the wound edge.** Images from this video are displayed in Fig. 1 D. The epidermis of a *Drosophila* embryo expressing mCherry-Moesin (magenta) and GFP-Zipper (green) was wounded and subjected to time-lapse live imaging. Merged images were also shown. The time after wounding is indicated (minutes and seconds). The size of the imaged area is 12  $\mu$ m  $\times$  12  $\mu$ m.

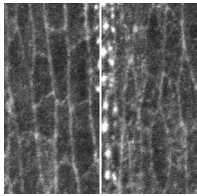

Video 2. **Dynamics of actin during wound healing in control and SCAR $\Delta$ <sup>37</sup> embryos.** Images from this video are displayed in Fig. 2 A. *Drosophila* embryos expressing GFP-Moesin (left, control; right, SCAR $\Delta$ <sup>37</sup> zygotic mutant) were wounded and subjected to time-lapse live imaging. The time after wounding is indicated (minutes and seconds). The size of the imaged areas is 20  $\mu$ m  $\times$  40  $\mu$ m.

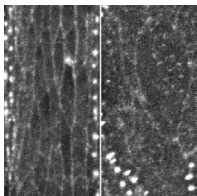

Video 3. **Dynamics of actin during wound healing in control and dia<sup>5</sup> M/Z embryos.** Images from this video are displayed in Fig. 3 A. *Drosophila* embryos expressing GFP-Moesin (left, control; right, dia<sup>5</sup> M/Z mutant) were wounded and subjected to time-lapse live imaging. The time after wounding is indicated (minutes and seconds). The size of the imaged areas is 26.7  $\mu$ m  $\times$  53.4  $\mu$ m.

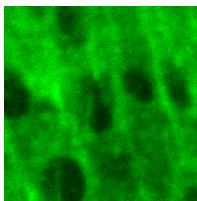

Video 4. **Dynamics of actin and Dynamin during wound healing.** Images from this video are displayed in Fig. 5 A. *Drosophila* embryos expressing Dynamin-GFP (green) and mCherry-Moesin (magenta) were wounded and subjected to time-lapse live imaging. Individual channels and a merged image are shown. The time after wounding is indicated (minutes and seconds). The size of the imaged areas is 20  $\mu$ m  $\times$  20  $\mu$ m.

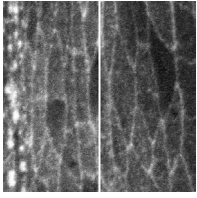

Video 5. **Dynamics of actin during wound healing in control and *shi*<sup>2</sup> embryos.** *Drosophila* embryos expressing GFP-Moesin (left, control; right, *shi*<sup>2</sup> mutant) were wounded and subjected to time-lapse live imaging. The time after wounding is indicated (minutes and seconds). The images at 2 min and 30 s in this video are displayed in Fig. 5 E (top right). The size of the imaged areas is 20  $\mu\text{m}$   $\times$  40  $\mu\text{m}$ .

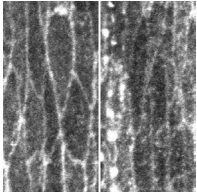

Video 6. **Dynamics of actin during wound healing in control and Rab5DN-expressing embryos.** *Drosophila* embryos expressing GFP-Moesin  $\pm$  Rab5-DN (left, control; right, +Rab5DN) were wounded and subjected to time-lapse live imaging. The time after wounding is indicated (minutes and seconds). The images at 2 min and 30 s in this video are displayed in Fig. 5 E (bottom right). The size of the imaged areas is 20  $\mu\text{m}$   $\times$  40  $\mu\text{m}$ .

Table S1. Genotypes of the embryos used in each experiment

| Figure  | Panel                                                        | Genotype                                                                         |                                           |
|---------|--------------------------------------------------------------|----------------------------------------------------------------------------------|-------------------------------------------|
| Fig. 1  | A                                                            | e22c-Gal4, UAS-GMA/+                                                             |                                           |
|         | B                                                            | e22c-Gal4, UAS-mCherry-Moesin, Ubi-DEcad-GFP/+                                   |                                           |
|         | D                                                            | e22c-Gal4, UAS-mCherry-Moesin, UAS-GFP-Zipper/+; i76D-Gal4, UAS-mCherry-Moesin/+ |                                           |
|         | E                                                            | 112A-Gal4, cGMA                                                                  |                                           |
|         | F, left                                                      | 112A-Gal4, cGMA                                                                  |                                           |
|         | F, middle and right                                          | e22c-Gal4, UAS-GMA/+                                                             |                                           |
| Fig. 2  | A–C, Control                                                 | 112A-Gal4, cGMA                                                                  |                                           |
|         | A–C, SCAR <sup>Δ37</sup>                                     | 112A-Gal4, cGMA; SCAR <sup>Δ37</sup>                                             |                                           |
| Fig. 3  | A–D, Control                                                 | 112A-Gal4, cGMA                                                                  |                                           |
|         | A and B, <i>dia</i> <sup>5</sup> M/Z                         | 112A-Gal4, cGMA; <i>dia</i> <sup>5</sup> M/Z <sup>a</sup>                        |                                           |
|         | D, <i>dia</i> <sup>5</sup> M/Df                              | 112A-Gal4, cGMA; <i>dia</i> <sup>5</sup> M/Df                                    |                                           |
|         | E, Control                                                   | Df(2L)ED1317, sqh-GFP/+                                                          |                                           |
|         | E, <i>dia</i> <sup>5</sup> M/Df                              | Df(2L)ED1317, sqh-GFP/ <i>dia</i> <sup>5</sup>                                   |                                           |
| Fig. 4  | Control                                                      | cGMA                                                                             |                                           |
|         | WASp <sup>3</sup>                                            | cGMA; <i>e</i> <sup>1</sup> , WASp <sup>3</sup>                                  |                                           |
| Fig. 5  | A                                                            | e22c-Gal4, UAS-mCherry-Moesin, UAS-Dyn-GFP/+                                     |                                           |
|         | B and C, Control                                             | e22c-Gal4, UAS-mCherry-Moesin/+                                                  |                                           |
|         | B and C, <i>shi</i> <sup>2</sup>                             | <i>shi</i> <sup>2</sup> ; e22c-Gal4, UAS-mCherry-Moesin/+                        |                                           |
|         | B and C, <i>shi</i> <sup>2</sup> + Dyn-GFP                   | <i>shi</i> <sup>2</sup> ; e22c-Gal4, UAS-mCherry-Moesin/UAS-Dyn-GFP              |                                           |
|         | D, top, Control                                              | e22c-Gal4, UAS-mCherry-Moesin/UAS-CLC-GFP                                        |                                           |
|         | D, bottom, <i>shi</i> <sup>2</sup>                           | <i>shi</i> <sup>2</sup> ; e22c-Gal4, UAS-mCherry-Moesin/UAS-CLC-GFP              |                                           |
|         | E, top, <i>shi</i> <sup>2</sup>                              | <i>shi</i> <sup>2</sup> ; e22c-Gal4, UAS-GMA/+                                   |                                           |
|         | E, bottom, Control                                           | e22c-Gal4, UAS-GMA/+; UAS-RedStinger/+ <sup>b</sup>                              |                                           |
|         | E, bottom, Rab5DN                                            | e22c-Gal4, UAS-GMA/+; UAS-Rab5DN/+                                               |                                           |
|         | F, Control                                                   | e22c-Gal4, UAS-GMA/+                                                             |                                           |
| Fig. 6  | A–D, GFP-Dia, Control                                        | e22c-Gal4, UAS-mCherry-Moesin/UAS-GFP-Dia                                        |                                           |
|         | A–D, GFP-Dia, <i>shi</i> <sup>2</sup>                        | <i>shi</i> <sup>2</sup> ; e22c-Gal4, UAS-mCherry-Moesin/UAS-GFP-Dia              |                                           |
| Fig. 7  | A, GFP                                                       | e22c-Gal4, UAS-mCherry-Moesin/+; i76D-Gal4, UAS-mCherry-Moesin/UAS-GFP           |                                           |
|         | A and B, Control                                             | e22c-Gal4, UAS-mCherry-Moesin, Ubi-DEcad-GFP/+                                   |                                           |
| Fig. S1 | A and B, Rab5DN                                              | e22c-Gal4, UAS-mCherry-Moesin, Ubi-DEcad-GFP/+; UAS-Rab5DN/+                     |                                           |
|         | C and D, Control                                             | 112A-Gal4, cGMA                                                                  |                                           |
|         | C and D, <i>shg</i> <sup>k03401</sup>                        | 112A-Gal4, cGMA; <i>shg</i> <sup>k03401</sup>                                    |                                           |
|         | E, Control                                                   | 112A-Gal4, cGMA                                                                  |                                           |
|         | E, <i>shg</i> <sup>k03401</sup> /+                           | 112A-Gal4, cGMA; <i>shg</i> <sup>k03401</sup> /+                                 |                                           |
|         | E, <i>shi</i> <sup>2</sup>                                   | 112A-Gal4, cGMA, <i>shi</i> <sup>2</sup>                                         |                                           |
|         | E, <i>shi</i> <sup>2</sup> ; <i>shg</i> <sup>k03401</sup> /+ | 112A-Gal4, cGMA, <i>shi</i> <sup>2</sup> ; <i>shg</i> <sup>k03401</sup> /+       |                                           |
|         | F, Control                                                   | 112A-Gal4, cGMA                                                                  |                                           |
|         | F, p120def                                                   | 112A-Gal4, cGMA; p120ctn deficient <sup>c</sup>                                  |                                           |
|         | F, <i>shi</i> <sup>2</sup>                                   | 112A-Gal4, cGMA, <i>shi</i> <sup>2</sup>                                         |                                           |
|         | F, <i>shi</i> <sup>2</sup> ; p120def                         | 112A-Gal4, cGMA, <i>shi</i> <sup>2</sup> ; p120ctn-deficient                     |                                           |
|         | Fig. S2                                                      | No RNAi                                                                          | TubP-Gal4, UAS-GMA/+                      |
|         |                                                              | Control RNAi                                                                     | TubP-Gal4, UAS-GMA/UAS- <i>ebony</i> RNAi |
| Fig. S3 | Sra1 RNAi                                                    | TubP-Gal4, UAS-GMA/UAS- <i>sra1</i> RNAi                                         |                                           |
|         | Control                                                      | 112A-Gal4, cGMA                                                                  |                                           |
| Fig. S4 | <i>dia</i> <sup>5</sup> M/Z                                  | 112A-Gal4, cGMA; <i>dia</i> <sup>5</sup> M/Z                                     |                                           |
|         | A, Control                                                   | e22c-Gal4, UAS-GFP-Zipper/+                                                      |                                           |
|         | A, <i>shi</i> <sup>2</sup>                                   | <i>shi</i> <sup>2</sup> ; e22c-Gal4, UAS-GFP-Zipper/+                            |                                           |
|         | B, Control                                                   | cGMA                                                                             |                                           |
| Fig. S5 | B, <i>shi</i> <sup>2</sup>                                   | cGMA, <i>shi</i> <sup>2</sup>                                                    |                                           |
|         | GFP-DiaΔDAD                                                  | e22c-Gal4, UAS-mCherry-Moesin, UAS-GFP-DiaΔDAD/+                                 |                                           |

cGMA, constitutive GFP-Moesin; CLC, clathrin light chain; DE-cad, *Drosophila* E-cadherin; GMA, GFP-Moesin; Ubi, ubiquitin promoter.

<sup>a</sup>For details of *dia* mutants, see Materials and methods.

<sup>b</sup>RedStinger is a DsRed RFP targeted to the nucleus. It was used as a control.

<sup>c</sup>For details of p120def, see Materials and methods.
